# Supplementary material for: Development of algorithms for determining heart failure with reduced and preserved ejection fraction using nationwide electronic healthcare records in the UK
Source: HighWire-hosted journal article supplement (doi:10.1136/openhrt-2022-002142), 2022-11-01
Supplement: openhrt-2022-002142supp001_data_supplement.pdf [file openhrt-2022-002142supp001_data_supplement.pdf]

## Supplement 1

**Table S1:** Read codes for identification of different heart failure phenotypes in Thin EHR

### Non-specific heart failure codes

| Readcode | READ TERM                                                   |
|----------|-------------------------------------------------------------|
| G580.00  | Congestive heart failure                                    |
| G580.00  | Left ventricular failure                                    |
| G58..11  | Cardiac failure                                             |
| G58..00  | Heart failure                                               |
| G580.11  | Congestive cardiac failure                                  |
| G58z.00  | Heart failure NOS                                           |
| G581000  | Acute left ventricular failure                              |
| 1O1..00  | Heart failure confirmed                                     |
| G580200  | Compensated cardiac failure                                 |
| 662T.00  | Congestive heart failure monitoring                         |
| 662g.00  | New York Heart Association classification - class II        |
| G58z.12  | Cardiac failure NOS                                         |
| 9N2p.00  | seen by community heart failure nurse                       |
| 662h.00  | New York Heart Association classification - class III       |
| G232.00  | hypertensive heart&renal dis wth (congestive) heart failure |
| G581.11  | asthma - cardiac                                            |
| G580000  | Acute congestive heart failure                              |
| 8B29.00  | Cardiac failure therapy                                     |
| 8HHb.00  | referral to heart failure nurse                             |
| G580200  | Decompensated cardiac failure                               |
| G582.00  | Acute heart failure                                         |
| 662W.00  | Heart failure annual review                                 |
| G580100  | Chronic congestive heart failure                            |
| 8H2S.00  | admit heart failure emergency                               |
| 9Or..00  | Heart failure monitoring administration                     |
| 8CL3.00  | Heart failure care plan discussed with patient              |
| ZRad.00  | new york heart assoc classification heart failure symptoms  |
| 662i.00  | New York Heart Association classification - class IV        |
| G211100  | benign hypertensive heart disease with ccf                  |
| G234.00  | Hyperten heart&renal dis+both(congestv)heart and renal fail |
| 67D4.00  | Heart failure information given to patient                  |
| SP11111  | Heart failure as a complication of care                     |
| 9N6T.00  | Referred by heart failure nurse specialist                  |
| 8HHz.00  | referral to heart failure exercise programme                |
| 8Hk0.00  | Referred to heart failure education group                   |
| 9Or4.00  | heart failure monitoring second letter                      |
| G210100  | malignant hypertensive heart disease with ccf               |
| 9Or3.00  | Heart failure monitoring first letter                       |

|         |                                                             |
|---------|-------------------------------------------------------------|
| 662p.00 | Heart failure 6 month review                                |
| 9Or5.00 | Heart failure monitoring third letter                       |
| 9Or2.00 | heart failure monitoring verbal invite                      |
| 9Or1.00 | heart failure monitoring telephone invite                   |
| 679X.00 | Heart failure education                                     |
| 8CMK.00 | Has heart failure management plan                           |
| 8CeC.00 | preferred place of care for next exacerbation heart failure |
| 8CMW800 | Heart failure clinical pathway                              |
| 661M500 | heart failure self-management plan agreed                   |
| 1736.00 | Paroxysmal nocturnal dyspnoea                               |
| G5yyA00 | Left ventricular diastolic dysfunction                      |
| 9N0k.00 | Seen in heart failure clinic                                |
| 14A6.00 | h/o: heart failure                                          |
| 8HBE.00 | Heart failure follow-up                                     |
| 14AM.00 | H/O: Heart failure in last year                             |
| 8HTL.00 | Referral to heart failure clinic                            |
| G21z100 | Hypertensive heart disease NOS with CCF                     |
| 8HTL000 | referral to rapid access heart failure clinic               |
| 2JZ..00 | On optimal heart failure therapy                            |
| 388D.00 | New York Heart Assoc classification heart failure symptoms  |

**Definite HFREF codes**

| MEDCODE | READ TERM                                                  |
|---------|------------------------------------------------------------|
| G581000 | Acute left ventricular failure                             |
| 33BA.00 | Impaired left ventricular function                         |
| G5yy900 | Left ventricular systolic dysfunction                      |
| G580.14 | Biventricular failure                                      |
| 585f.00 | Echocardiogram shows left ventricular systolic dysfunction |
| 9On..00 | Left ventricular dysfunction monitoring administration     |
| G5yyD00 | Left ventricular cardiac dysfunction                       |
| 9On0.00 | Left ventricular dysfunction monitoring first letter       |

**Possible HFREF codes**

| MEDCODE | READ TERM                          |
|---------|------------------------------------|
| G55..00 | Cardiomyopathy                     |
| G343.00 | Ischaemic cardiomyopathy           |
| G554400 | Primary dilated cardiomyopathy     |
| G55y.11 | Secondary dilated cardiomyopathy   |
| G55z.00 | Cardiomyopathy NOS                 |
| G554z00 | Other primary cardiomyopathy NOS   |
| G55y.00 | Secondary cardiomyopathy NOS       |
| G558.00 | Cardiomyopathy in disease EC       |
| G555.00 | Alcoholic cardiomyopathy           |
| G558z00 | Cardiomyopathy in diseases EC, NOS |

|           |                                    |
|-----------|------------------------------------|
| G55A.00   | Tachycardiomyopathy                |
| G55A.11   | Tachycardia-induced cardiomyopathy |
| 12CJ.00FH | Cardiomyopathy                     |
| G554200   | Familial Cardiomyopathy            |

**HFpEF codes**

| <b>MEDCODE</b> | <b>READ TERM</b>                                    |
|----------------|-----------------------------------------------------|
| G583.11        | HFNEF - heart failure with normal ejection fraction |
| G583.00        | Heart failure with normal ejection fraction         |
| G583.12        | Heart failure with preserved ejection fraction      |
| G5yyC00        | Diastolic dysfunction                               |
| G5yyA00        | Left ventricular diastolic dysfunction              |

## Supplement 2: Questionnaire sent to general practitioner for the validation study

**Please answer all the questions according to the information held in the patient's written records by ticking the appropriate box or writing in the space provided.**

1. Do you think this patient has Heart failure with:-
  - Reduced Ejection Fraction (HFrEF) (Ejection Fraction  $\leq 40\%$ )**
  - Preserved Ejection Fraction (HFpEF) (Ejection Fraction  $\geq 50\%$ )**
  - Mid-range Ejection Fraction (HFmrEF) (Ejection Fraction 41-49 %)**
  - Unknown Ejection Fraction**
2. What was the diagnosis based on? (Please circle all that apply)  
Echocardiogram      Biomarkers      Signs and Symptoms      other  
(please describe)
3. Has a cardiologist seen the patient and confirmed a diagnosis of HF?  
 Yes       No       Uncertain
4. Does the patient have any other cardiac condition?  
 Yes       No       Uncertain  
If yes, please state
5. Was the patient hospitalised for heart failure (HF) at any point?  
 Yes       No       Uncertain
6. Has the patient received intravenous diuretics as an outpatient or at home?  
 Yes       No
7. Will you be able to send copies of any relevant material, such as extracts from patient notes, echocardiogram, relevant lab tests (eg. BNP, NT-pro BNP) cardiology outpatient letters or hospital discharge letters?

### Researcher's Ref:

We would appreciate receiving depersonalized copies of all relevant material, such as extracts from patient's notes or hospital discharge letters.
